# Supplementary material
Source: PubMed Central journal article supplement (PMC4869926)

## **SUPPLEMENTAL DATA**

### **Luciferase assay**

H9C2 rat cardiomyocytes were differentiated and transfected with a TGF- $\beta$ 1-responsive PAI-1 promoter luciferase plasmid <sup>1</sup> and pRL-thymidine kinase transfection control plasmid before treating for 24h with 10 ng/mL TGF $\beta$ 1, in the presence of 500 nM CPI211 or vehicle. A Dual-Luciferase assay was performed per manufacturer's protocol (Promega, Madison, WI).

### **References**

1. Hutcheson JD, Ryzhova LM, Setola V and Merryman WD. 5-HT(2B) antagonism arrests non-canonical TGF-beta1-induced valvular myofibroblast differentiation. *J Mol Cell Cardiol.* 2012;53:707-14.

**Supplemental Figure 1:** Visualization of LymM-GFP cells. Whole hearts from LysM-Cre mice were snap-frozen, sectioned, and confocally visualized at 10x. Sections were stitched together with 15% overlap using NIS Elements software to get an overview of monocyte-lineage cells in the heart.

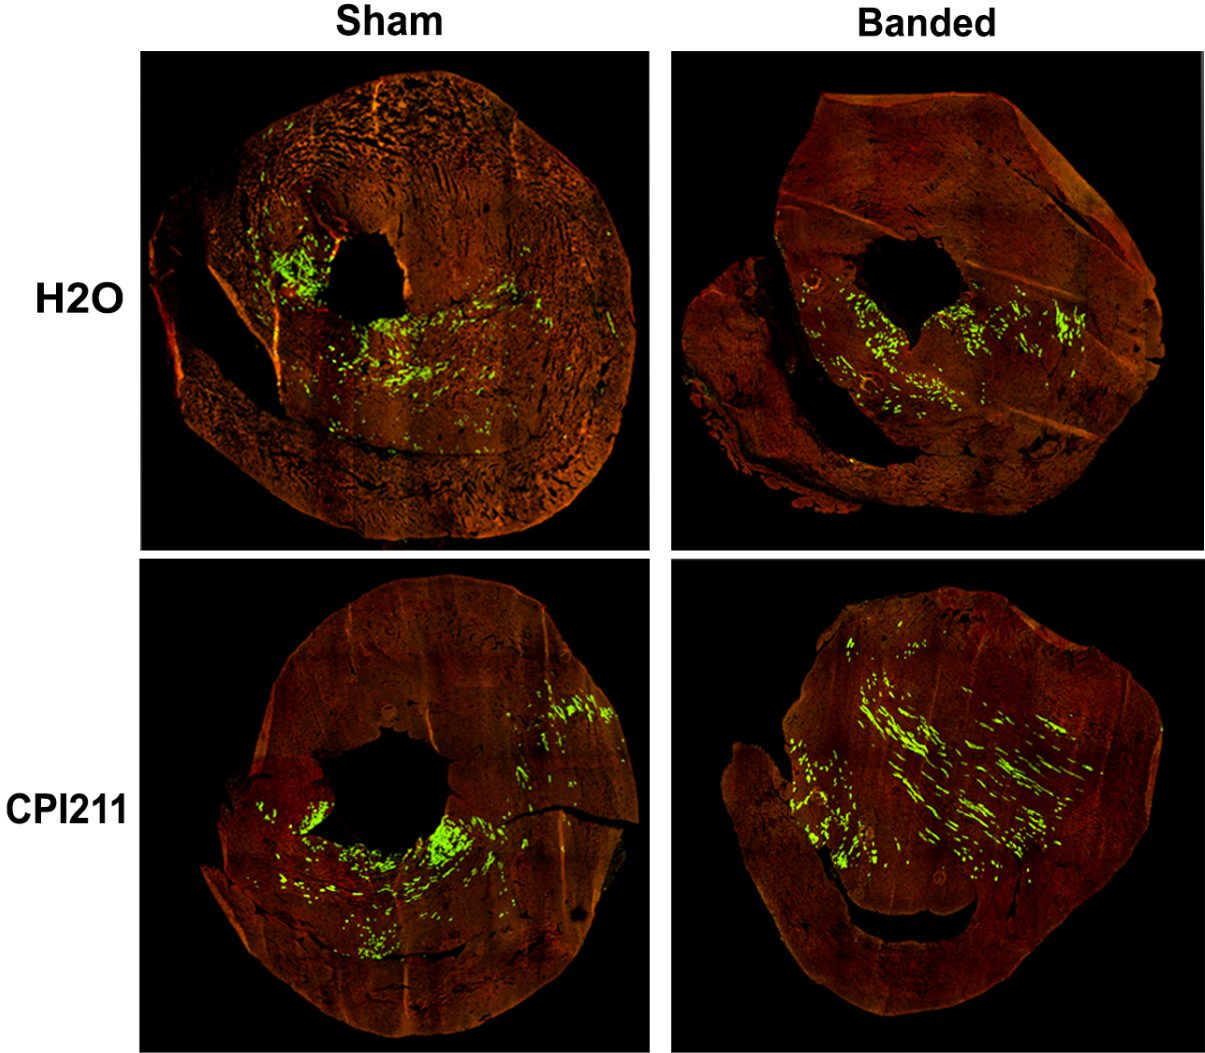

**Supplemental Figure 2: (A-B) Gating strategies for FACS analysis of monocytes from C57Bl/6 mice, with representative images. (C) Gating strategy for LysM-eGFP RV (green = GFP+; fuchsia = CD45+). The GFP gate was derived using a GFP-negative littermate heart as FMO control.**

**A Gating strategy for percent of total RV cells:**

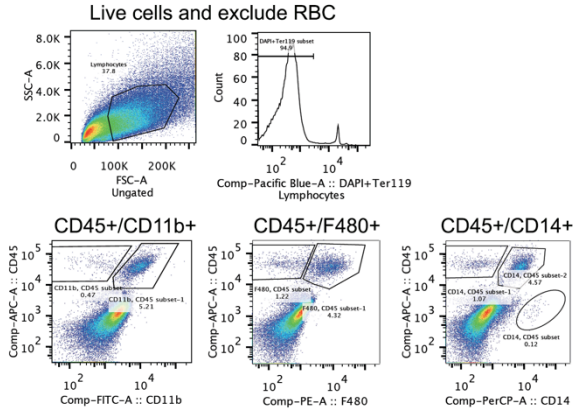

**B Gating strategy for activation state:**

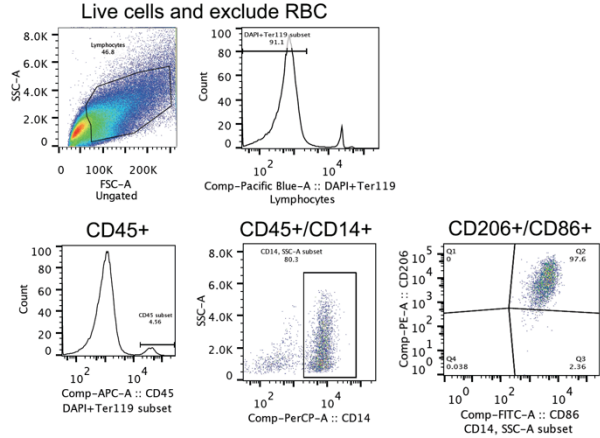

**C**

**Gating strategy for LysM-eGFP mice:**

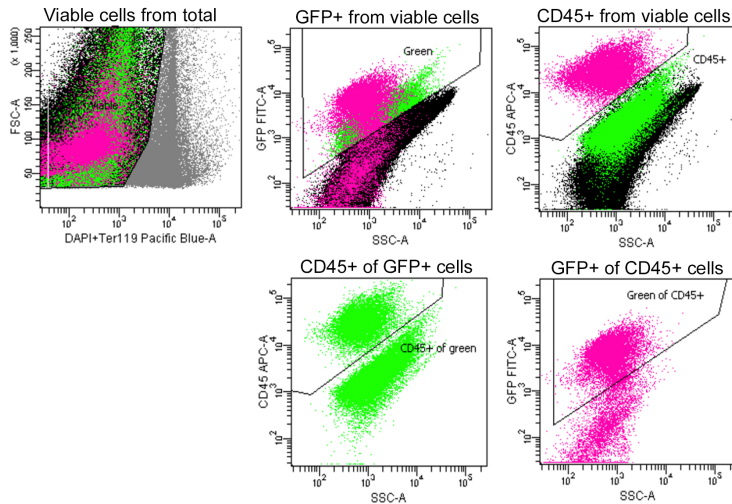

**Supplemental Figure 3:** In cultured H9C2 cardiomyocytes, CPI211 does not block protein expression of canonical TGF- $\beta$  target PAI-1 (A), nor does it block induction of a luciferase activity driven by a PAI1 promoter (B).

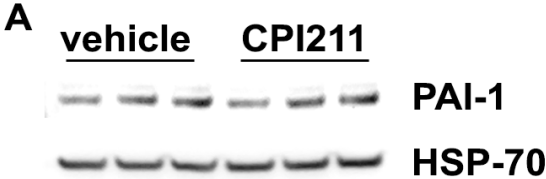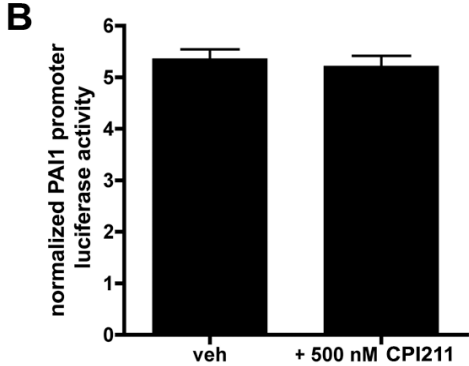

**Supplemental Figure 4:** Immunoblot of TP receptor in RV from sham-operated and PAB mice. When normalized to HSP-70, mean band densities were 0.561 (sham) and 0.542 (PAB; SEM for each was 0.026). Intervening lanes were removed from blot where indicated.

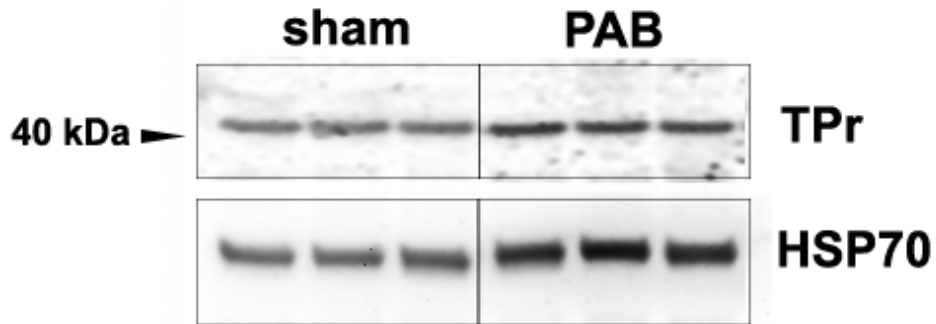

Supplement: PulmCirc-006-211.s001.pdf [file PulmCirc-006-211.s001.pdf]
