# Supplementary material
Source: PubMed Central journal article supplement (PMC4869926)
Supplement: PulmCirc-006-211.s002.pdf [file PulmCirc-006-211.s002.pdf]

**Supplemental Table 1:** All echocardiography parameters gathered, from all experiments combined. Parameters specific to the RV are highlighted. The only parameters omitted for space are multiples of a parameter (the average is presented) and basic mathematical computations from parameters shown here (i.e. artery diameter is presented, but not the  $\pi r^2$  area calculation). Aorta diameter was taken at the left ventricular outflow tract. Group numbers are shown by standard deviations. \*Some mouse values were omitted from the sham-CPI211 group because a malfunction in the heating table appeared to affect heart rates. The effect on other parameters was unknown.

| GROUP and (n)         | AVG LVOT DIAM. (mm) | AVG LVOT VTI (cm) | LV SV mL/min | AVG HEART RATE | LV CO mL/min | AVG LVIDd (mm) | AVG LVIDs (mm) | FRACT. SHORT. % | DIASTOL r <sup>2</sup> (mm) | END DIASTOL VOLUME AVG (mm) | SYSTOL r <sup>2</sup> (mm) | END SYSTOL VOLUME AVG (mm) | EJECT. FRACT. AVG % | CI mLs/min/kg | PULM ARTERY DIAM. (mm) | PULM ARTERY VTI (cm) | RV SV (mL/min) | RV CO (mL/min) | RV CI (CO/BSA) | PULM ARTERY ACCEL TIME | TRICUSP VALVE E WAVE AVG | TRICUSP VALVE A WAVE AVG | TRICUSP VALVE E/A RATIO | % DIFF BETW. E & A |
|-----------------------|---------------------|-------------------|--------------|----------------|--------------|----------------|----------------|-----------------|-----------------------------|-----------------------------|----------------------------|----------------------------|---------------------|---------------|------------------------|----------------------|----------------|----------------|----------------|------------------------|--------------------------|--------------------------|-------------------------|--------------------|
| SHAM VEHICLE          | 1.55                | 1.46              | 0.028        | 301            | 8.40         | 3.15           | 2.06           | 34.9            | 2.52                        | 31.2                        | 1.09                       | 9.12                       | 71.54               | 924           | 1.80                   | 1.58                 | 0.042          | 12.70          | 1356           | 26.3                   | 183                      | 68.6                     | 2.68                    | 38.2               |
| ST DEV (6)            | 0.18                | 0.18              | 0.007        | 15             | 2.24         | 0.39           | 0.39           | 7.4             | 0.60                        | 10.6                        | 0.42                       | 5.34                       | 10.16               | 218           | 0.15                   | 0.22                 | 0.009          | 3.35           | 270            | 7.0                    | 45                       | 15.6                     | 0.45                    | 6.8                |
| SHAM CPI211           | 1.60                | 1.48              | 0.030        | 305            | 9.24         | 3.24           | 1.95           | 39.5            | 2.66                        | 34.0                        | 0.97                       | 7.56                       | 76.78               | 909           | 1.71                   | 1.77                 | 0.036          | 12.65          | 1327           | 30.4                   | 232                      | 79.2                     | 2.94                    | 34.8               |
| ST DEV (8*)           | 0.13                | 0.37              | 0.008        | 72             | 3.30         | 0.41           | 0.30           | 8.3             | 0.66                        | 12.2                        | 0.30                       | 3.45                       | 8.83                | 130           | 0.25                   | 0.41                 | 0.015          | 6.62           | 335            | 8.1                    | 77                       | 23.7                     | 0.34                    | 3.7                |
| PAB VEHICLE           | 1.54                | 1.62              | 0.030        | 318            | 9.76         | 3.13           | 2.01           | 35.8            | 2.48                        | 30.5                        | 1.04                       | 8.47                       | 72.69               | 1133          | 1.65                   | 1.71                 | 0.038          | 11.87          | 1381           | 37.6                   | 235                      | 87.7                     | 2.77                    | 41.0               |
| ST DEV (12)           | 0.14                | 0.26              | 0.008        | 43             | 3.14         | 0.37           | 0.35           | 6.8             | 0.59                        | 10.7                        | 0.34                       | 3.87                       | 7.97                | 317           | 0.14                   | 0.36                 | 0.013          | 4.08           | 445            | 9.9                    | 84                       | 27.3                     | 0.96                    | 13.5               |
| PAB CPI211 (25 mg/kg) | 1.49                | 1.69              | 0.030        | 317            | 9.53         | 3.17           | 2.11           | 33.5            | 2.54                        | 31.6                        | 1.14                       | 9.66                       | 70.14               | 1118          | 1.65                   | 1.64                 | 0.038          | 12.12          | 1439           | 41.8                   | 252                      | 65.5                     | 3.99                    | 26.1               |
| ST DEV (10)           | 0.12                | 0.49              | 0.013        | 31             | 4.22         | 0.36           | 0.33           | 5.0             | 0.57                        | 10.8                        | 0.34                       | 4.18                       | 6.44                | 471           | 0.15                   | 0.36                 | 0.010          | 3.11           | 392            | 10.2                   | 95                       | 26.8                     | 0.90                    | 5.3                |
| PAB CPI211 (3 mg/kg)  | 1.46                | 1.66              | 0.029        | 361            | 10.33        | 3.12           | 2.09           | 33.3            | 2.46                        | 29.9                        | 1.11                       | 9.18                       | 69.88               | 1280          | 1.56                   | 1.35                 | 0.025          | 8.99           | 1151           | 46.7                   | 261                      | 82.2                     | 3.29                    | 33.4               |
| ST DEV (6)            | 0.12                | 0.66              | 0.014        | 14             | 4.94         | 0.28           | 0.29           | 5.0             | 0.45                        | 8.4                         | 0.30                       | 3.67                       | 6.55                | 503           | 0.11                   | 0.34                 | 0.008          | 2.94           | 290            | 5.4                    | 86                       | 23.6                     | 0.95                    | 12.6               |
| PAB ASPIRIN           | 1.59                | 1.70              | 0.034        | 380            | 13.03        | 3.10           | 2.04           | 34.7            | 2.45                        | 30.2                        | 1.08                       | 9.10                       | 71.51               | 1232          | 1.87                   | 1.49                 | 0.043          | 16.16          | 1824           | 37.5                   | 195                      | 70.0                     | 2.79                    | 36.2               |
| ST DEV (6)            | 0.24                | 0.60              | 0.017        | 17             | 6.92         | 0.45           | 0.44           | 6.4             | 0.72                        | 13.4                        | 0.46                       | 5.55                       | 7.96                | 310           | 0.10                   | 0.25                 | 0.008          | 2.75           | 611            | 9.6                    | 57                       | 19.6                     | 0.32                    | 3.9                |
| PAB OZAGREL           | 1.53                | 1.67              | 0.032        | 354            | 11.31        | 2.97           | 1.80           | 39.3            | 2.24                        | 26.2                        | 0.83                       | 5.95                       | 77.37               | 1391          | 1.58                   | 1.12                 | 0.022          | 7.69           | 960            | 44.3                   | 283                      | 103.0                    | 2.89                    | 35.5               |
| ST DEV (7)            | 0.14                | 0.34              | 0.012        | 26             | 4.76         | 0.38           | 0.27           | 4.0             | 0.55                        | 9.3                         | 0.24                       | 2.51                       | 4.75                | 500           | 0.09                   | 0.26                 | 0.005          | 1.57           | 173            | 10.7                   | 97                       | 46.4                     | 0.47                    | 6.1                |

Abbreviations:

LVOT DIAM: Diameter of left ventricular outflow tract

VTI: Velocity time integral

SV: Stroke volume (LVOT area in cm × VTI)

CO: Cardiac output (SV × heart rate)

LVIDd: Left ventricular internal diameter end diastole

LVIDs: Left ventricular internal diameter end systole

CI: Cardiac index (CO × body surface area)

**Supplemental Table 2:** Flow sorting of whole RV for circulating macrophage markers in C57BL/6 mice; all comparisons were non-significant by 2-way ANOVA. Each n is a separate mouse RV. FACS data used to construct the plots and gating strategies are shown in Supplemental Figure 1.

|                          | <b>Sham veh</b>     | <b>Sham<br/>CPI211</b> | <b>PAB veh</b>      | <b>PAB CPI211</b>   |
|--------------------------|---------------------|------------------------|---------------------|---------------------|
| <b>% CD45+</b>           | <b>5.51 ± 0.20</b>  | <b>5.40 ± 0.37</b>     | <b>5.75 ± 0.55</b>  | <b>5.3 ± 0.94</b>   |
| <b>% CD45+/F480+</b>     | <b>2.92 ± 0.25</b>  | <b>3.30 ± 0.38</b>     | <b>3.23 ± 0.47</b>  | <b>2.80 ± 0.52</b>  |
| <b>% CD45+/CD11b+</b>    | <b>4.53 ± 0.32</b>  | <b>4.33 ± 0.39</b>     | <b>4.81 ± 0.43</b>  | <b>4.51 ± 1.18</b>  |
| <b>% CD45+/CD14+</b>     | <b>3.48 ± 0.28</b>  | <b>3.90 ± 0.49</b>     | <b>4.14 ± 0.41</b>  | <b>3.46 ± 0.70</b>  |
| <b>CD206+ % of CD45+</b> | <b>96.52 ± 1.30</b> | <b>97.37 ± 0.46</b>    | <b>97.43 ± 0.69</b> | <b>96.53 ± 1.37</b> |
| <b>CD86+ % of CD45+</b>  | <b>1.97 ± 0.66</b>  | <b>1.60 ± 0.20</b>     | <b>1.71 ± 0.41</b>  | <b>2.20 ± 0.67</b>  |
| <b>total n</b>           | <b>4</b>            | <b>6</b>               | <b>5</b>            | <b>3</b>            |
